# Supplementary material for: Single-molecule long-read sequencing analysis improves genome annotation and sheds new light on the transcripts and splice isoforms of Zoysia japonica
Source: Springer Nature journal article supplement (doi:10.1186/s12870-022-03640-7), 2022-05-26

# Statistics of Pathway Enrichment

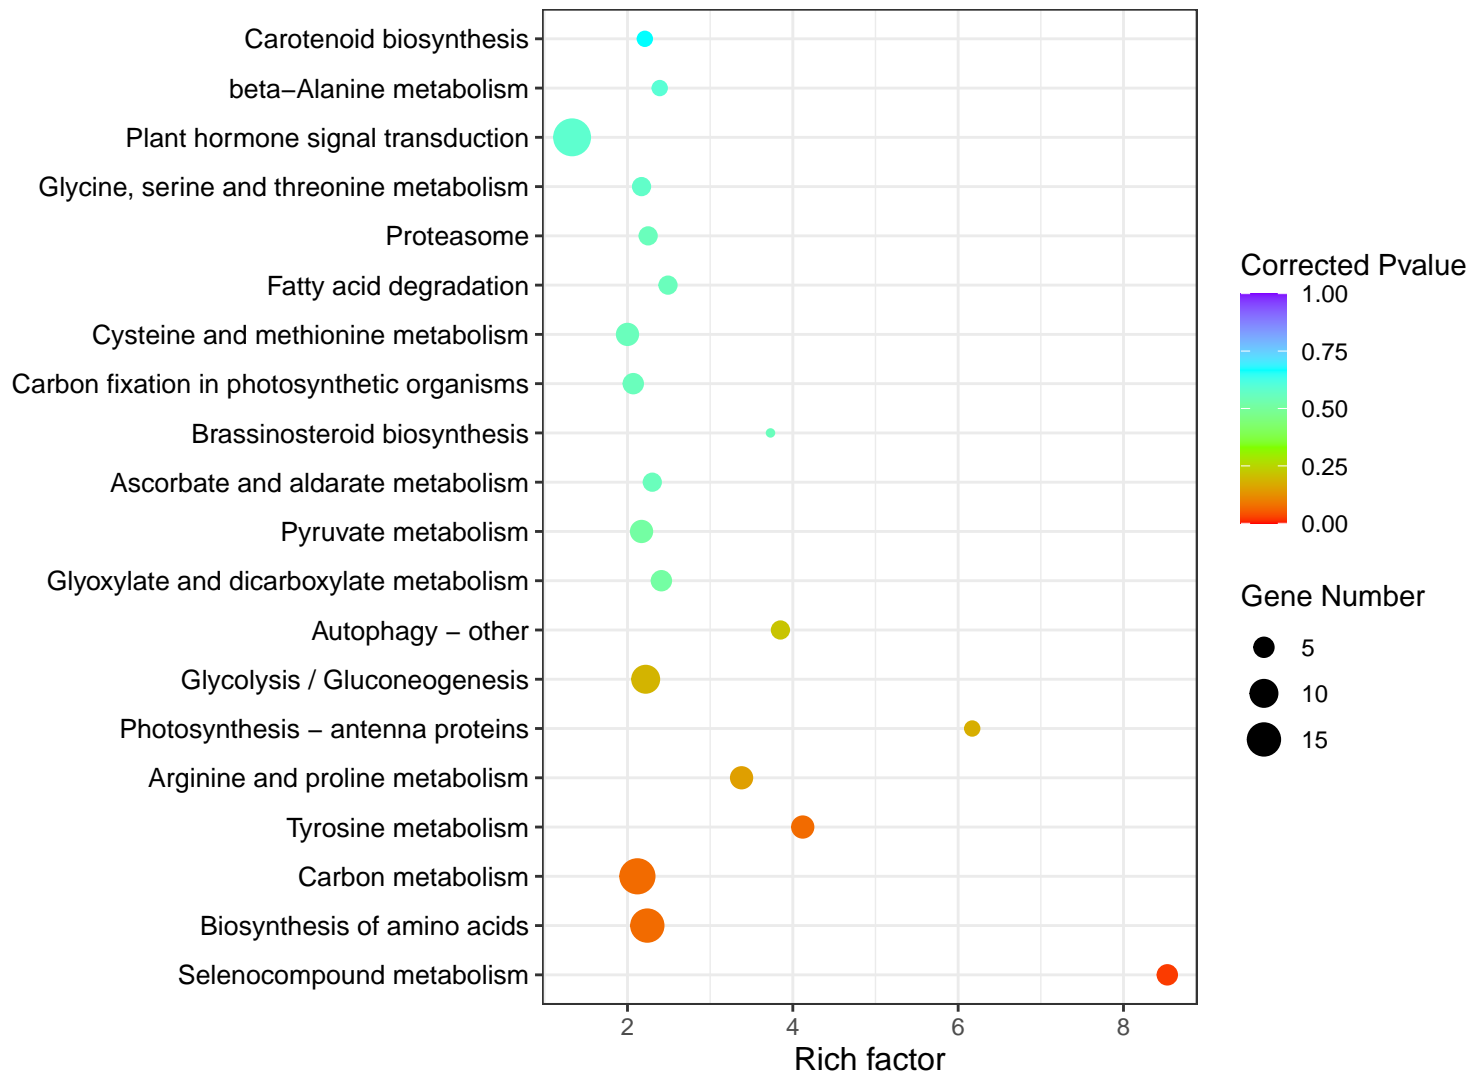

Supplement: MOESM3 [file 12870_2022_3640_MOESM3_ESM.pdf]
